# Supplementary material
Source: publisher site journal article supplement (https://www.dovepress.com/article/560629)
Supplement: Supplementary file 1 [file Appendix%201%20-%20Identified%20Papers.pdf]

**Appendix 1 - Identified papers**

| Ref No in Manuscript | Surname of first author | Year | Country of the study | Paper title                                                                                                                                                                 | Aim of the study                                                                                                                                                                                            | Research Methods | Discussed core components of MTBC model | Discussed Factors | Discussed Barriers |
|----------------------|-------------------------|------|----------------------|-----------------------------------------------------------------------------------------------------------------------------------------------------------------------------|-------------------------------------------------------------------------------------------------------------------------------------------------------------------------------------------------------------|------------------|-----------------------------------------|-------------------|--------------------|
| 36                   | Abdulrhim               | 2021 | Qatar                | Collaborative care model for diabetes in primary care settings in Qatar: A qualitative exploration among healthcare professionals and patients who experienced the service. | To explore the value of CCM in diabetes care at a primary healthcare (PHC) setting from the perspective of patients with diabetes and healthcare professionals (HCPs).                                      | Qualitative      | Yes                                     | Yes               | Yes                |
| 75                   | Albarqi                 | 2024 | Saudi Arabia         | Assessing the impact of multidisciplinary collaboration on quality of life in older patients receiving primary care: Cross sectional study.                                 | To assess the impact of multidisciplinary collaboration on the quality of life (QoL) in older patients receiving primary care.                                                                              | Quantitative     | Yes                                     | No                | No                 |
| 85                   | Alty                    | 2023 | Australia            | A new one-stop interdisciplinary cognitive clinic model tackles rural health inequality and halves the time to diagnosis: Benchmarked against a national dementia registry. | To evaluate the implementation of a one-stop state-wide clinic model of people in rural/remote areas.                                                                                                       | Quantitative     | No                                      | No                | Yes                |
| 70                   | Berkowitz               | 2018 | US                   | Multidisciplinary coordinated care for Type 2 diabetes: A qualitative analysis of patient perspectives.                                                                     | Obtain patient perspectives that could drive implementation of patient-centered diabetes care in the primary care setting.                                                                                  | Qualitative      | No                                      | No                | Yes                |
| 41                   | Bidwell                 | 2017 | New Zealand          | A model of multidisciplinary professional development for health professionals in rural Canterbury, New Zealand.                                                            | To develop an accessible multidisciplinary model of professional development for general practitioners, nurse practitioners, practice nurses and community pharmacists in rural areas.                      | Quantitative     | Yes                                     | Yes               | Yes                |
| 67                   | Bissett                 | 2020 | England              | A qualitative study exploring strategies to improve the inter-professional management of diabetes and periodontitis. Primary Care Diabetes.                                 | To explore inter-professional communication and collaboration in guideline-concordant diabetes and periodontitis care.                                                                                      | Qualitative      | No                                      | No                | Yes                |
| 77                   | Boorsma                 | 2011 | Netherlands          | Effects of multidisciplinary integrated care on quality of care in residential care facilities for elderly people: A cluster randomized trial.                              | To determine the effects of multidisciplinary integrated care on quality of care and quality of life for elderly people in residential care facilities.                                                     | Quantitative     | Yes                                     | No                | No                 |
| 48                   | Bunnell                 | 2010 | USA                  | Models of multidisciplinary cancer care: Physician and patient perceptions in a comprehensive cancer center.                                                                | To understand clinicians perceptions of the advances and disadvantages of the multidisciplinary clinics models.                                                                                             | Mixed Methods    | No                                      | Yes               | Yes                |
| 60                   | Caeiro                  | 2019 | Portugal             | Interdisciplinary stratified care for low back pain: A qualitative study on the acceptability, potential facilitators and barriers to implementation.                       | To explore the acceptability and identify potential barriers and facilitators regarding the upcoming implementation of this project, based on the general practitioners' and physiotherapists' perceptions. | Qualitative      | No                                      | No                | Yes                |
| 61                   | Cheong                  | 2013 | Australia            | Multidisciplinary collaboration in primary care: Through the eyes of patients.                                                                                              | To understand experiences, perceptions, attitudes and role of people with asthma on the delivery of MDC in primary health care.                                                                             | Qualitative      | No                                      | No                | Yes                |
| 68                   | Chong                   | 2023 | Singapore            | General practitioners' perceptions of the roles of community pharmacists and their willingness to collaborate with pharmacists in primary care.                             | To explore GPs' perceptions of CPs' current roles and GPs' ideas for and attitudes towards interprofessional collaboration.                                                                                 | Qualitative      | No                                      | No                | Yes                |
| 49                   | Christensen             | 2023 | Denmark              | Interprofessional team-based collaboration between designated GPs and care home staff: A qualitative study in an urban Danish setting.                                      | To evaluate experiences from the interprofessional team-based collaboration between designated general practitioners and care home staff.                                                                   | Qualitative      | No                                      | Yes               | No                 |
| 37                   | Cicccone                | 2010 | Italy                | Feasibility and effectiveness of a disease and care management model in the primary health care system for patients with heart failure and diabetes (Project Leonardo).     | To evaluate the impact of a disease and care management model and of the introduction of "care manager" nurses, into the primary health care system.                                                        | Quantitative     | No                                      | Yes               | No                 |
| 84                   | Debar                   | 2010 | USA                  | A primary care-based interdisciplinary team approach to the treatment of chronic pain utilizing a pragmatic clinical trials framework.                                      | To evaluate the strengths and challenges of interdisciplinary teams in primary care based treatment.                                                                                                        | Quantitative     | Yes                                     | No                | Yes                |
| 53                   | DeMiglio                | 2012 | Canada               | Factors enabling shared care with primary healthcare providers in community settings: The experiences of interdisciplinary palliative care teams.                           | To examine how teams negotiate barriers in order to share mutual responsibility for patients with PHCPs (i.e., family physicians and community nurses).                                                     | Qualitative      | No                                      | Yes               | Yes                |
| 62                   | Donaghy                 | 2024 | Scotland             | Primary care transformation in Scotland: a qualitative study of GPs' and multidisciplinary team members' views.                                                             | To explore practitioners' views on the expansion of MDT working in Scotland                                                                                                                                 | Qualitative      | No                                      | No                | Yes                |
| 43                   | Drummond                | 2012 | Canada               | Interprofessional primary care in academic family medicine clinics: Implications for education and training.                                                                | To examine interprofessional practices to varying degrees to understand the components of interprofessional collaborative care.                                                                             | Mixed Methods    | Yes                                     | Yes               | Yes                |
| 63                   | Elissen                 | 2011 | Netherlands          | Can we make sense of multidisciplinary co-operation in primary care by considering routines and rules?                                                                      | To explore primary care providers are fulfilling their multidisciplinary co-operative ambitions.                                                                                                            | Qualitative      | No                                      | No                | Yes                |
| 73                   | Felder                  | 2018 | Netherlands          | Together alone: Organizing integrated, patient-centered primary care in the layered institutional context of Dutch healthcare governance.                                   | To understand dynamics between professionals and institutional contexts.                                                                                                                                    | Qualitative      | Yes                                     | No                | Yes                |
| 47                   | Fjaagesund              | 2024 | Australia            | Chiropractors in multidisciplinary teams: Enablers of colocation integration in GP-Led primary healthcare.                                                                  | To explore the enablers of integration and referral pathways of chiropractic practice and medical doctors within a primary care centre.                                                                     | Qualitative      | Yes                                     | Yes               | Yes                |
| 76                   | Gaboury                 | 2010 | Canada               | Practitioners' validation of framework of team-oriented practice models in integrative health care: A mixed methods study.                                                  | To test nine hypotheses of models with a range from parallel practice to integrative practice.                                                                                                              | Mixed Methods    | Yes                                     | No                | Yes                |

|    |               |      |             |                                                                                                                                                                                                                  |                                                                                                                                                                                                    |                   |     |     |     |
|----|---------------|------|-------------|------------------------------------------------------------------------------------------------------------------------------------------------------------------------------------------------------------------|----------------------------------------------------------------------------------------------------------------------------------------------------------------------------------------------------|-------------------|-----|-----|-----|
| 57 | Gardenier     | 2019 | US          | Interprofessional team-based approach to patients with chronic hepatitis C and personality disorder: Three case studies.                                                                                         | Evaluate the engagement of chronic hepatitis C in primary health care.                                                                                                                             | Qualitative       | No  | Yes | No  |
| 79 | Giannitrapani | 2016 | USA         | Role expansion on interprofessional primary care teams: Barriers of role self-efficacy among clinical associates.                                                                                                | To assess primary care teams experiences with implementing expanded roles for clinical associates.                                                                                                 | Qualitative       | Yes | No  | Yes |
| 50 | Gibbs         | 2017 | Australia   | Implementing a collaborative mental health care model: The MHPN.                                                                                                                                                 | Description of key MHPN model components highlighting engaging practitioners and supporting interdisciplinary practice.                                                                            | Description Paper | Yes | Yes | Yes |
| 42 | Grol          | 2018 | Netherlands | The role of the general practitioner in multidisciplinary teams: A qualitative study in elderly care.                                                                                                            | To unravel how GPs play a successful role in multidisciplinary teams, and to define key concepts for success.                                                                                      | Qualitative       | No  | Yes | No  |
| 35 | Hawes         | 2018 | USA         | Accountable care in transitions (ACTion): A team-based approach to reducing hospital utilization in a patient-centered medical home.                                                                             | To evaluate the effectiveness of a multidisciplinary transitions program embedded in a primary care mental health.                                                                                 | Quantitative      | No  | Yes | No  |
| 46 | Johnson       | 2020 | USA         | Development and implementation of an interdisciplinary intensive primary care clinic for high-need high-cost patients in a safety net hospital.                                                                  | To evaluate the program by comparing utilization before and after the intervention and to identify patient and process characteristic predictors of 30-day rehospitalizations.                     | Quantitative      | No  | Yes | Yes |
| 40 | Kirby         | 2018 | Ireland     | Multi-disciplinary decision making in general practice.                                                                                                                                                          | To explore GP's prevalence and characteristics of multi-disciplinary decision making.                                                                                                              | Quantitative      | No  | Yes | Yes |
| 69 | Kooffreh-Ada  | 2023 | Nigeria     | Case studies of multi-disciplinary team management of atypical gastric cancer: Challenges and lessons learned (about two cases).                                                                                 | To describe two cases of gastric cancer and the role of MDT in their evaluation and management.                                                                                                    | Qualitative       | No  | No  | Yes |
| 74 | Kósa          | 2020 | Hungary     | Health mediators as members of multidisciplinary group practice: Lessons learned from a primary health care model programme in Hungary.                                                                          | To assess workload and estimate their contribution to the implementation of health status assessment and community health promoting programmes.                                                    | Quantitative      | Yes | No  | No  |
| 45 | Lawn          | 2014 | Australia   | Description of key MHPN model components highlighting engaging practitioners and supporting interdisciplinary practice.                                                                                          | To describe the experience of co-locating a range of different primary health services into one building, with the aim of providing integrated services.                                           | Qualitative       | Yes | Yes | Yes |
| 11 | Leach         | 2017 | USA         | Primary care multidisciplinary teams in practice: A qualitative study.                                                                                                                                           | To describe a range of primary care multidisciplinary teams, ideal team designs and to identify perceived contextual facilitating factors and barriers to implementation.                          | Qualitative       | Yes | Yes | Yes |
| 80 | Liberati      | 2016 | Italy       | Invisible walls within multidisciplinary teams: Disciplinary boundaries and their effects on integrated care.                                                                                                    | To develop a descriptive and explanatory understanding of the boundaries related to collaboration and care integration in MDTs.                                                                    | Qualitative       | Yes | No  | Yes |
| 54 | Lyson         | 2019 | USA         | Redesigning primary care in the safety net: A qualitative analysis of teambased care implementation.                                                                                                             | To identify a diverse sample of safety-net clinics with a variety of variables in California.                                                                                                      | Qualitative       | Yes | Yes | Yes |
| 44 | Mathews       | 2024 | Canada      | Adapting care provision in family practice during the COVID-19 pandemic: A qualitative study exploring the impact of primary care reforms in four Canadian regions.                                              | To examine the impact of a series of primary care reforms on family physicians' ability to adapt their roles during the COVID-19 pandemic.                                                         | Qualitative       | No  | Yes | Yes |
| 59 | Metzelthin    | 2013 | Netherlands | A nurse-led interdisciplinary primary care approach to prevent disability among community-dwelling frail older people: A large-scale process evaluation.                                                         | To examine the interdisciplinary care approach and gain insight into healthcare professionals'/ frail older people's experiences regarding the benefits, burden, stimulating factors and barriers. | Mixed Methods     | Yes | Yes | Yes |
| 83 | Mitchell      | 2020 | Australia   | Factors affecting the embedding of integrated primary-secondary care into a health district.                                                                                                                     | To articulate what steps that would facilitate routine, integrated care between primary and secondary care providers for patients with complex care needs.                                         | Qualitative       | Yes | Yes | Yes |
| 29 | Morabito      | 2024 | Italy       | Improving the quality of patient care in lung cancer: Key factors for successful multidisciplinary team working. Exploration of Targeted Anti-tumor Therapy.                                                     | To describe strengths and weaknesses of two MDT models with an emphasis on the key factors that characterize high-quality patient care in lung cancer.                                             | Review Paper      | No  | No  | Yes |
| 71 | Naqvi         | 2019 | UK          | The general practice perspective on barriers to integration between primary and social care: A London, United Kingdom-based qualitative interview study.                                                         | To explore the unique perspectives of frontline staff (general practitioners and practice managers) towards barriers to integration.                                                               | Qualitative       | No  | No  | Yes |
| 55 | Nieuwboer     | 2018 | Netherlands | Identification of influencing factors and strategies to improve communication between general practitioners and community nurses: A qualitative focus group study.                                               | To explore patient-related GP-CN communication and facilitating and hindering factors, and to identify strategies to enhance this communication.                                                   | Qualitative       | Yes | Yes | Yes |
| 81 | Powell        | 2014 | UK          | Multidisciplinary team management in thoracic oncology: More than just a concept?                                                                                                                                | Explore the history and implementation of MDT care in thoracic oncology.                                                                                                                           | Review Paper      | No  | No  | No  |
| 51 | Pullon        | 2016 | New Zealand | Observation of interprofessional collaboration in primary care practice: A multiple case study.                                                                                                                  | To directly observe elements of IPC in primary care settings.                                                                                                                                      | Qualitative       | No  | Yes | Yes |
| 52 | Purcell       | 2018 | USA         | The integrated pain team: A mixed-methods evaluation of the impact of an embedded interdisciplinary pain care intervention on primary care team satisfaction, confidence, and perceptions of care effectiveness. | To evaluate the impact of the Integrated Pain Team (IPT)—an interdisciplinary chronic pain care intervention embedded in primary care.                                                             | Mixed Methods     | No  | Yes | No  |
| 56 | Reckrey       | 2015 | USA         | The team approach to home-based primary care: Restructuring care to meet individual, program, and system needs.                                                                                                  | To implement a pilot program (The Team Approach) and compare with usual care.                                                                                                                      | Quantitative      | No  | Yes | Yes |

|    |               |      |           |                                                                                                                                                                                 |                                                                                                                                                                     |                               |     |     |     |
|----|---------------|------|-----------|---------------------------------------------------------------------------------------------------------------------------------------------------------------------------------|---------------------------------------------------------------------------------------------------------------------------------------------------------------------|-------------------------------|-----|-----|-----|
| 66 | Rosell        | 2018 | Sweden    | Benefits, barriers and opinions on multidisciplinary team meetings: A survey in Swedish cancer care.                                                                            | To optimize the MDTMs (team meetings), investigate participants' views on the meeting function, including perceived benefits and barriers.                          | Quantitative                  | No  | No  | Yes |
| 86 | Seaton        | 2023 | Australia | Facilitators of effective interprofessional collaborative practice for physiotherapy private practitioners: An interpretive descriptive study.                                  | To explore the facilitators of IPCP from the perspective of Australian physiotherapy private practitioners.                                                         | Review Paper                  | No  | No  | No  |
| 58 | Slåtveen      | 2024 | Norway    | Balancing between dual belongings when organised into interdisciplinary teams, with the trust model as the context: A qualitative study.                                        | To explore frontline workers' practices and experiences of working within interdisciplinary teams according to the trust model's goals.                             | Qualitative                   | Yes | Yes | Yes |
| 38 | Smith-Carrier | 2014 | Canada    | Analyzing the interprofessional working of a home-based primary care team.                                                                                                      | To identify key attributes for effective interprofessional working within a home-based primary care setting.                                                        | Qualitative                   | No  | Yes | Yes |
| 65 | Some          | 2020 | Canada    | Team-based primary care practice and physician's services: Evidence from Family Health Teams in Ontario, Canada.                                                                | To examine the impact of GP's switching from non family health teams to family health teams                                                                         | Quantitative                  | No  | Yes | Yes |
| 39 | Suter         | 2017 | Canada    | Advancing team-based primary health care: A comparative analysis of policies in western Canada.                                                                                 | To compare and analyse primary health care policies to understand how they inform the design and implementation of team-based primary health care service delivery. | Comparative Policy Analysis   | Yes | Yes | Yes |
| 72 | Vegesna       | 2016 | Italy     | Attitudes towards physician–nurse collaboration in a primary care team-based setting: Survey-based research conducted in the chronic care units of the Tuscany region of Italy. | To assess attitudes towards collaboration between nurses and GPs in the Chronic Care Unit.                                                                          | Qualitative                   | Yes | No  | Yes |
| 82 | Wang          | 2023 | China     | Factors influencing clinical pharmacists' integration into the clinical multidisciplinary care team.                                                                            | To investigate the factors influencing pharmacists' integration into MDT, using interprofessional collaboration between clinical pharmacists and physicians.        | Quantitative                  | No  | No  | Yes |
| 64 | Weber         | 2022 | Germany   | Boundary Work in response to professionals' contextual constraints: Micro-strategies in interprofessional collaboration.                                                        | To explore professional boundaries and contextual constraints and the effects of professional engagement.                                                           | Qualitative                   | Yes | No  | Yes |
| 4  | Wranik        | 2018 | Canada    | Funding models and medical dominance in interdisciplinary primary care teams: Qualitative evidence from three Canadian provinces.                                               | To assess types of financial environments that perpetuate and which reduce the challenge of medical dominance.                                                      | Qualitative & Policy Analysis | Yes | No  | Yes |
| 78 | Wranik        | 2017 | Canada    | Funding and remuneration of interdisciplinary primary care teams in Canada: A conceptual framework and application.                                                             | To develop a framework for the conceptualization and analysis of financial arrangements in interdisciplinary primary care teams.                                    | Qualitative                   | Yes | No  | Yes |
